# Supplementary material for: A natural anthocyanin-based multifunctional theranostic agent for dual-modal imaging and photothermal anti-tumor therapy
Source: Royal Society of Chemistry journal article supplement (doi:10.1039/d1tb00988e), 2021-01-01
Supplement: d1tb00988e1.pdf [file d1tb00988e1.pdf]

## Supporting Information

### **Natural Anthocyanin-Based Multifunctional Theranostic Agent for Dual-Modal Imaging and Photothermal Anti-Tumor Therapy**

Chunyan Guo,<sup>‡a,b</sup> Jinghua Sun,<sup>‡b</sup> Jie Dong,<sup>b</sup> Wenwen Cai,<sup>b</sup> Xuhui Zhao,<sup>b</sup> Bin Song<sup>\*b</sup>  
and Ruiping Zhang<sup>\*b</sup>

<sup>a</sup> *First Clinical Medical College of Shanxi Medical University, Taiyuan 030001, China.*

<sup>b</sup> *Third Hospital of Shanxi Medical University, Shanxi Bethune Hospital, Shanxi Academy of Medical Sciences; Tongji Shanxi Hospital, Tongji Medical College, Huazhong University of Science and Technology, Taiyuan, 030032, China*

<sup>‡</sup> The first two authors contributed equally to this work.

Correspondence: E-mail: songbintara@163.com

Correspondence: E-mail: zrp\_7142@sxmu.edu.cn

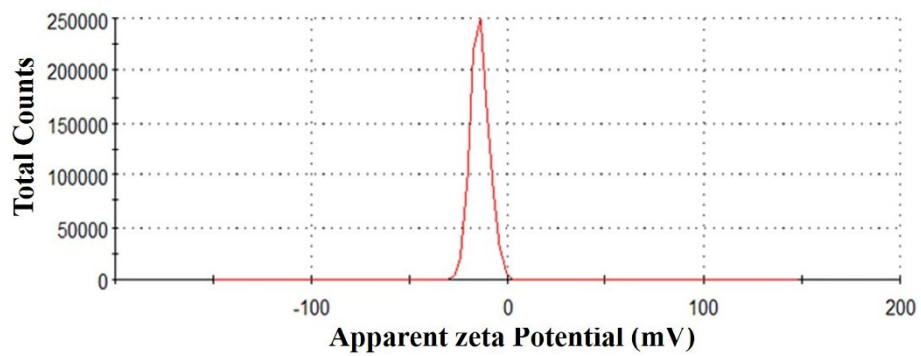

**Figure S1.** Zeta potential of ANP-Gd.

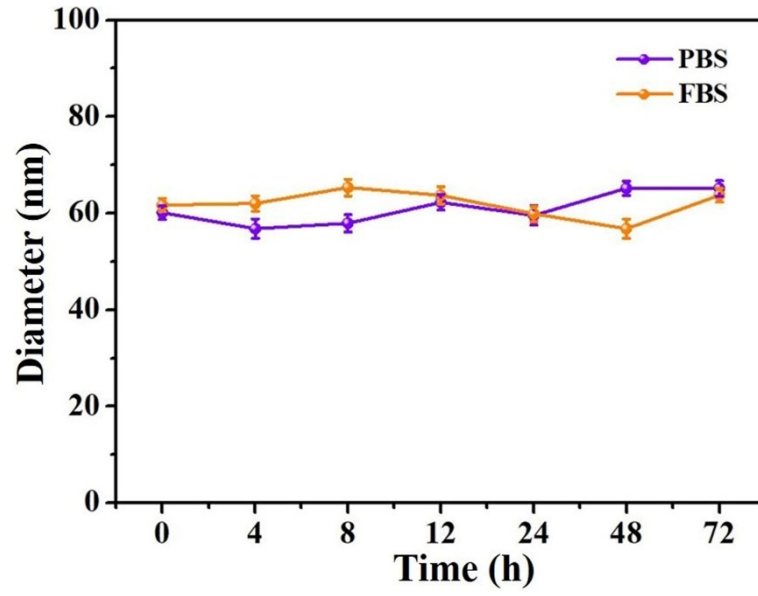

**Figure S2.** Stability study of ANP-Gd. The time-dependent changes in hydrodynamic diameters of ANP-Gd in PBS and FBS.

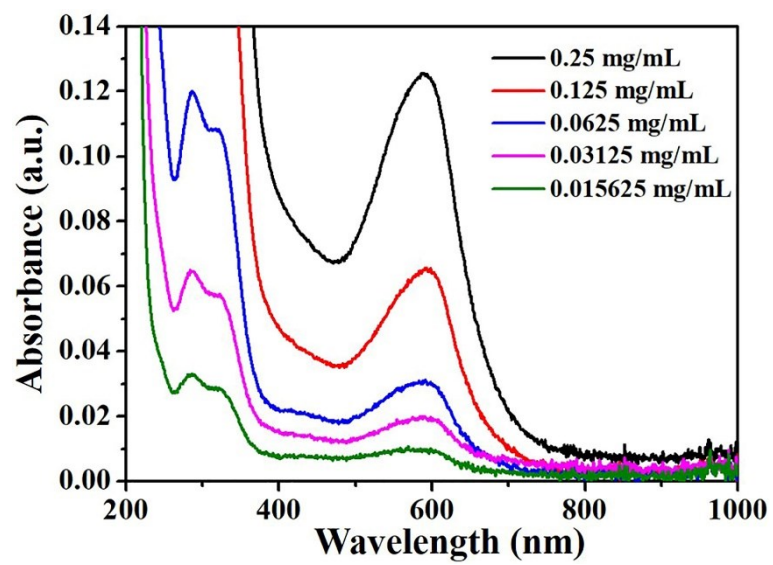

**Figure S3.** UV-Vis-NIR standard curves of different concentrations.

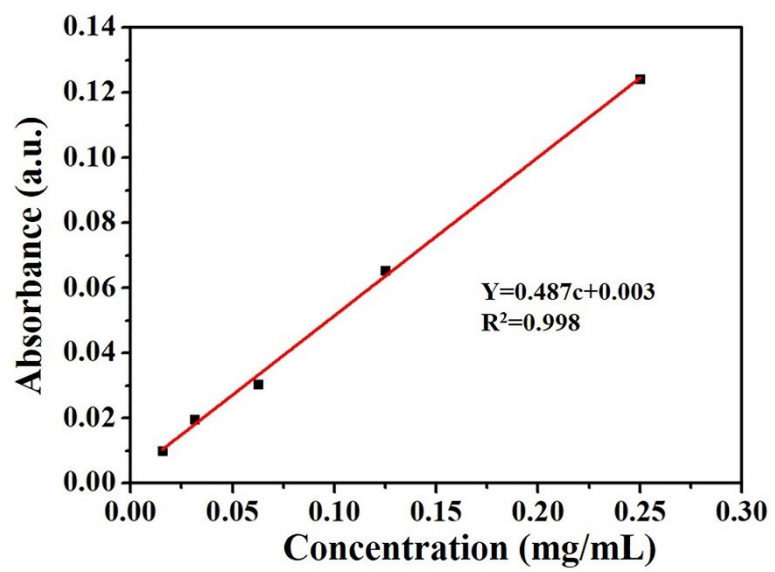

**Figure S4.** Linear relationship between UV-Vis-NIR absorption and concentrations of ANP-Gd.

**Table S1.** Complete blood panel indexes of mice for the control, and 1 d and 7 d after injected intravenously with a high dose of ANP-Gd.

| Mean±SE                |    | WBC( $10^9/L$ ) | RBC( $10^{12}/L$ ) | HGB(g/L)  | HCT(%)          |
|------------------------|----|-----------------|--------------------|-----------|-----------------|
| <b>Reference range</b> |    | 0.8-6.8         | 6.36-9.42          | 110-143   | 34.6-44.6       |
| Control                |    | 3.50            | 7.65               | 132.33    | 44.03           |
| ANP-Gd                 | 1d | 3.00            | 8.48               | 134.33    | 43.93           |
|                        | 7d | 4.03            | 7.35               | 128.33    | 42.87           |
| Mean±SE                |    | MCV(fL)         | MCH(pg)            | MCHC(g/L) | PLT( $10^9/L$ ) |
| <b>Reference range</b> |    | 48.2-58.3       | 15.8-19.0          | 302-353   | 100-600         |
| Control                |    | 57.53           | 17.16              | 304.00    | 587.00          |
| ANP-Gd                 | 1d | 57.43           | 17.37              | 303.33    | 593.00          |
|                        | 7d | 58.23           | 17.33              | 336.33    | 585.67          |
